# Supplementary material for: From Coexpression to Causality: Defining Functional Hub Genes in Basal-like Breast Cancer Networks
Source: Research Square preprint supplement (doi:10.21203/rs.3.rs-7321266/v1), 2025-08-11
Supplement: Supplementary file 1 [file 9e64683507f8da9b79c43205.pdf]

## Supplementary Materials

### **Breast cancer coexpression networks show cross-dataset preservation and reflect protein-level coordination**

|                              |     |
|------------------------------|-----|
| Supplementary Figure 1 ..... | p.2 |
| Supplementary Figure 2 ..... | p.3 |

### **Coexpression networks are clinically informative**

|                              |     |
|------------------------------|-----|
| Supplementary Figure 3 ..... | p.4 |
| Supplementary Figure 4 ..... | p.5 |
| Supplementary Figure 5 ..... | p.6 |

### **Disentangling subtype effects reveals robust and clinically informative basal-like coexpression modules**

|                              |        |
|------------------------------|--------|
| Supplementary Figure 6 ..... | p.7    |
| Supplementary Figure 7 ..... | p.8-11 |
| Supplementary Figure 8 ..... | p.12   |
| Supplementary Figure 9 ..... | p.13   |
| Supplementary Figure 10..... | p.14   |

### **Highly connected b\_E2F\_targets transcription factors significantly regulate the expression of module's genes.**

|                               |      |
|-------------------------------|------|
| Supplementary Table 1.....    | p.15 |
| Supplementary Figure 11 ..... | p.16 |

### **Silencing of five TF hubs significantly affects proliferation of BLBC cell lines.**

|                               |      |
|-------------------------------|------|
| Supplementary Figure 12 ..... | p.17 |
|-------------------------------|------|

### **Phenotypic effects of TF hub genes knockout correlate with transcriptional module disruption.**

|                               |      |
|-------------------------------|------|
| Supplementary Figure 13 ..... | p.18 |
| Supplementary Figure 14 ..... | p.19 |
| Supplementary Figure 15 ..... | p.20 |
| Supplementary Table 2.....    | p.21 |

### **Supplementary Material and Methods**

|                            |      |
|----------------------------|------|
| Supplementary Table 3..... | p.22 |
|----------------------------|------|

## Breast cancer coexpression networks show cross-dataset preservation and reflect protein-level coordination

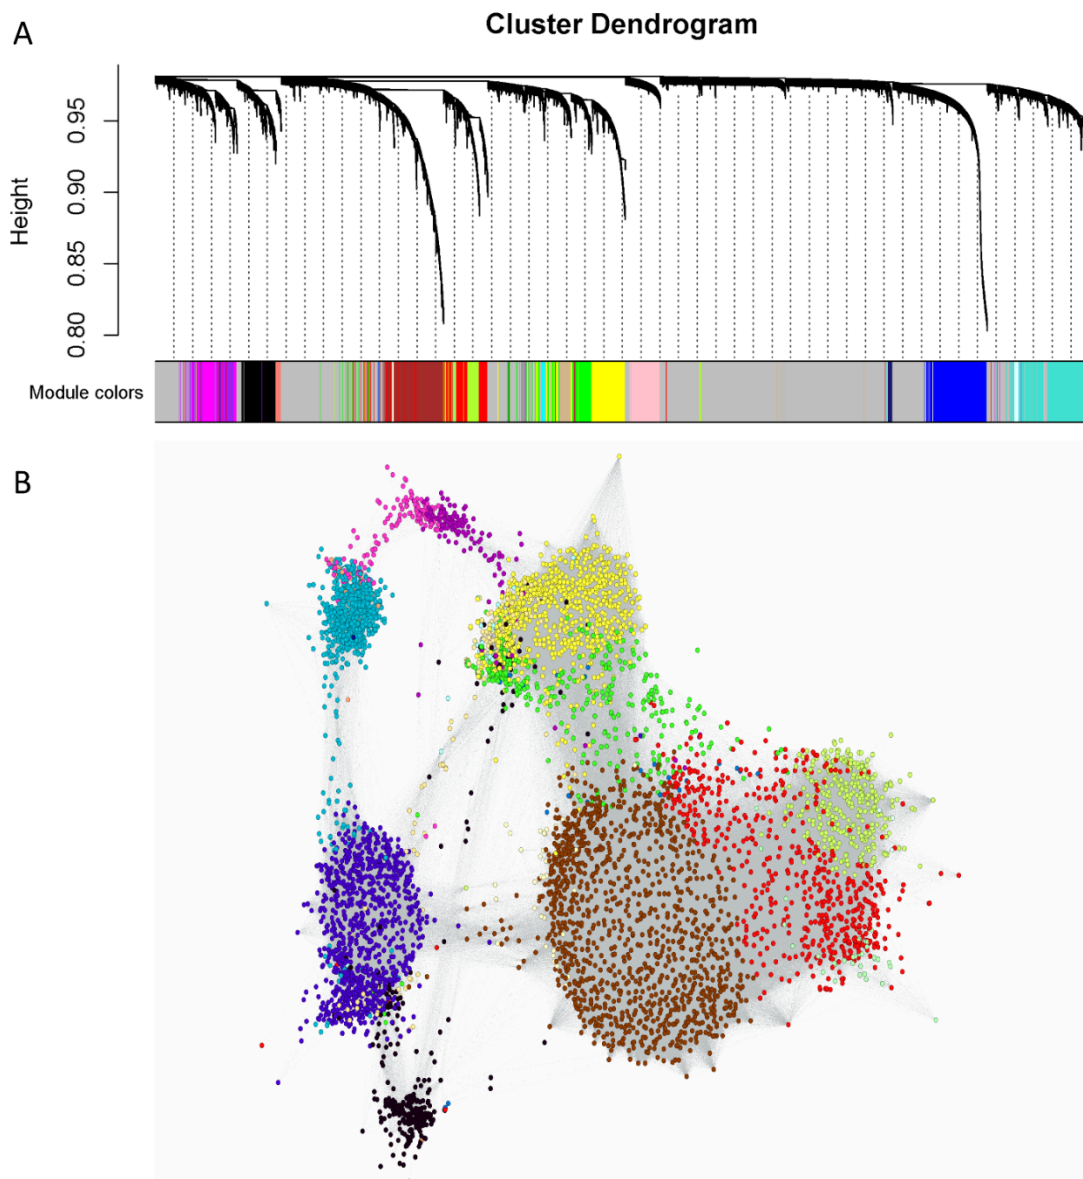

**Supplementary Figure 1. METABRIC gene co-expression network. (A)** Clustering of genes performed with WGCNA, each colour corresponding to a module. **(B)** Gephi representation of the network, where nodes are genes and edges are connections (only the strongest are represented, Topological Overlap  $\geq 0.05$ . Different colours correspond to different modules.

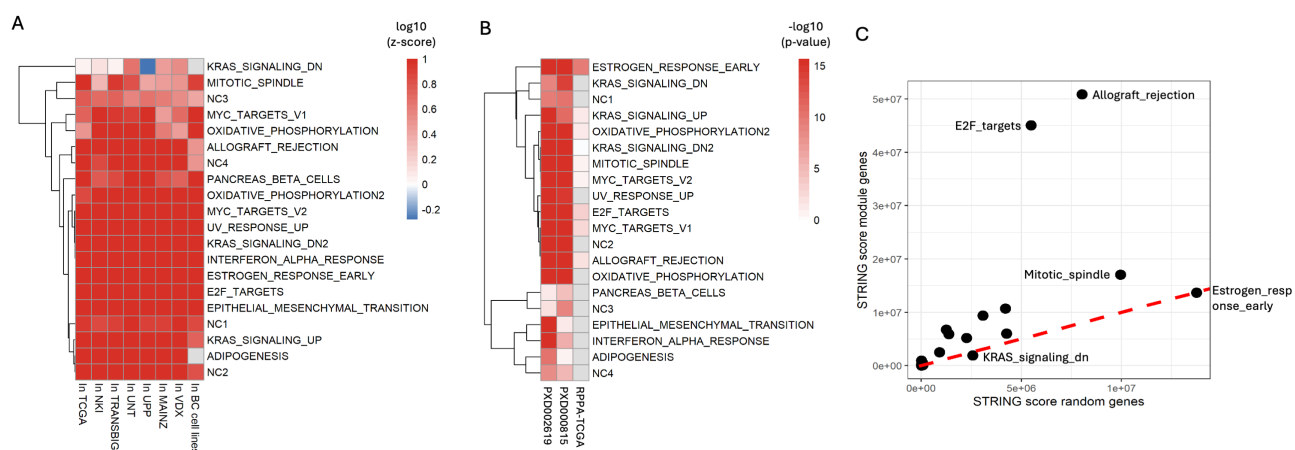

**Supplementary Figure 2. Breast cancer co-expression networks are robust. (A)** Heatmap summarizing the z-score of modules' preservation (rows) across 7 independent primary BC transcriptome datasets and one BC cell lines dataset (columns). The colour represents the log10 of z-scores, with red corresponding to higher preservation. **(B)** Heatmap showing the connectivity of modules (rows) in proteomic datasets (columns). The colour indicates the  $-\log_{10}$  of the p-value for a Kolmogorov-Smirnov test comparing the correlations of modules' genes with those of random genes. **(C)** The proteins encoded by co-expressed genes are more tightly connected than random proteins in the STRING interaction database. Obtained by summing the scores of the STRING database for each pair of interacting genes in one module (y axis) and comparing it with the corresponding measure obtained with an equal number of random genes (x axis). Each dot represents a module. Some relevant modules' names have been included next to the corresponding dot.

## Coexpression networks are clinically informative

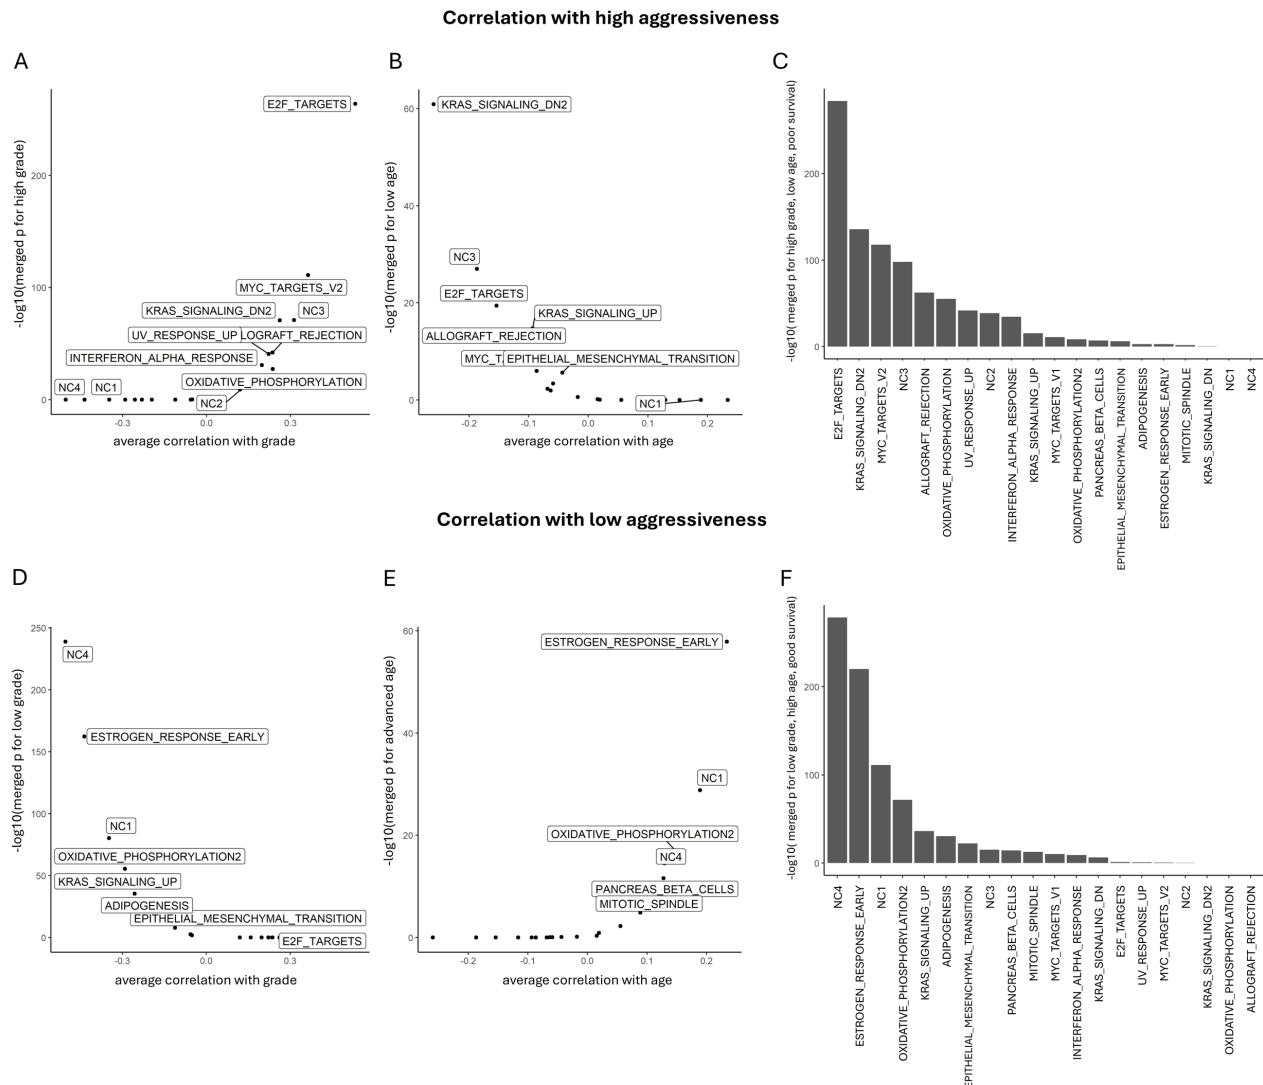

**Supplementary Fig. 3. Summary of modules' relationship with clinical features.** (A-C) Modules' correlation with features of high aggressiveness: high grade (A), early onset (B), merged score for high grade, early onset and poor prognosis (C). (D-F) Modules' correlation with features of low aggressiveness: low grade (D), late onset (E), merged score for low grade, late onset and good prognosis (F). (A,B,D,E) For each clinical feature, p-values were obtained by merging the p-values across all the individual tested datasets with the Fisher's method, considering the direction of the relationship between module's expression and the clinical feature. (C, F) for each module, the overall significance for the relationship with grade, age at diagnosis and survival was obtained by multiplying the individual dataset-merged p-values.



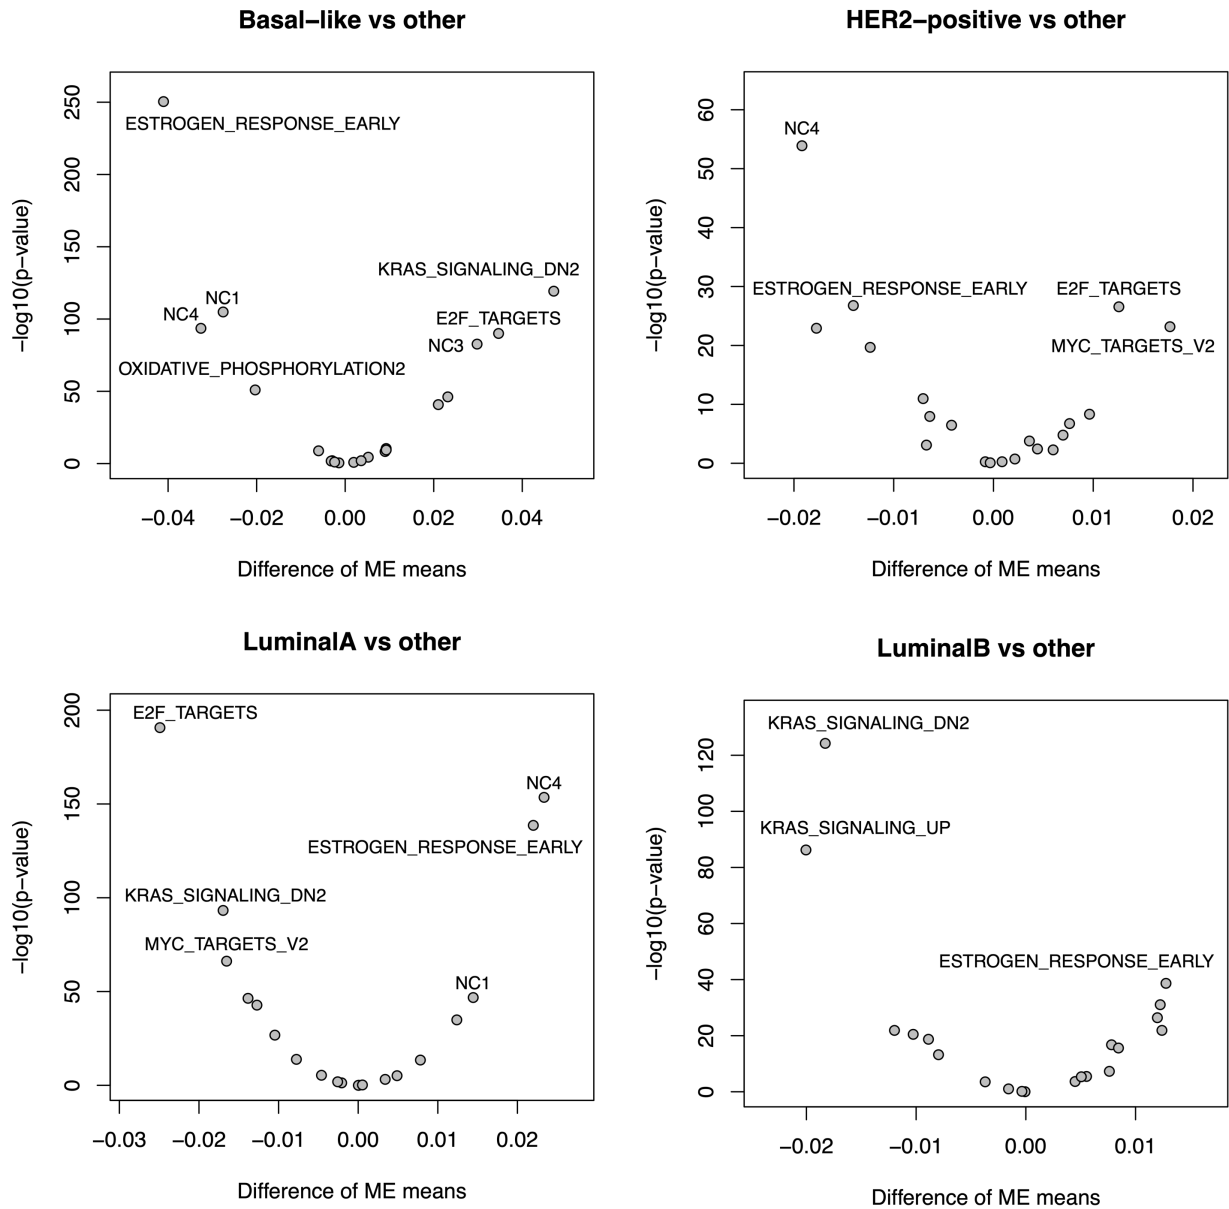

**Supplementary Figure 4. Expression of the modules across BC subtypes.** The expression of each module in a subtype (specified in the plot title) was compared with the expression of the same module in all other subtypes pooled together. The x-axis shows the difference between the module eigengene (ME) between the two groups, the y-axis represents the significance for the comparison. Note the overexpression of the modules *KRAS\_signaling\_dn2* and *E2F\_targets* in the basal-like tumors, of the *Estrogen\_response\_early* module in both luminal subtypes, and of the *E2F\_targets* in the HER2-positive tumors.  $p\text{-value} < 2.2 \times 10^{-16}$  in all cases.

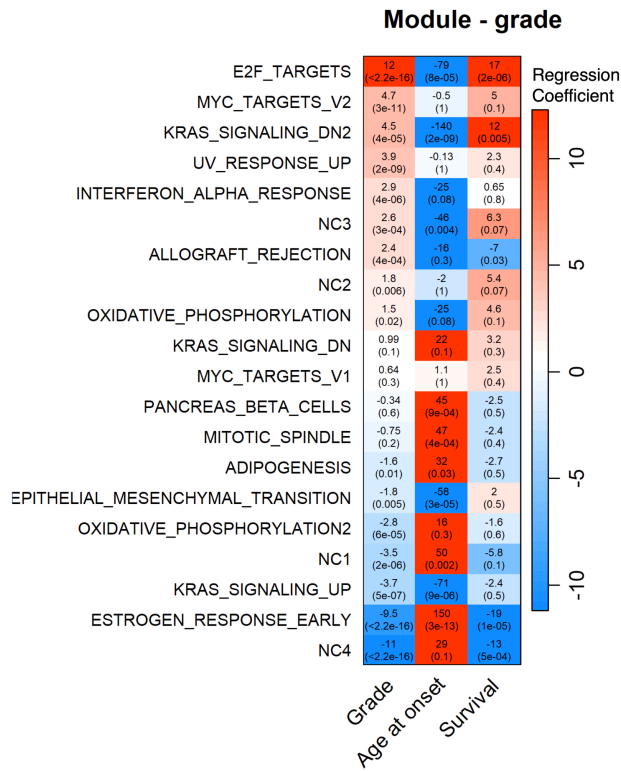

**Supplementary Figure 5. Modules correlate with clinical features independently of tumor subtype.** The heatmap and the enclosed numbers shows regression coefficients and corresponding p-values for module eigengenes (rows) in models with the indicated clinical features (columns) as dependent variables, and tumor subtype as a categorical covariate.

## Disentangling subtype effects reveals robust and clinically informative basal-like coexpression modules

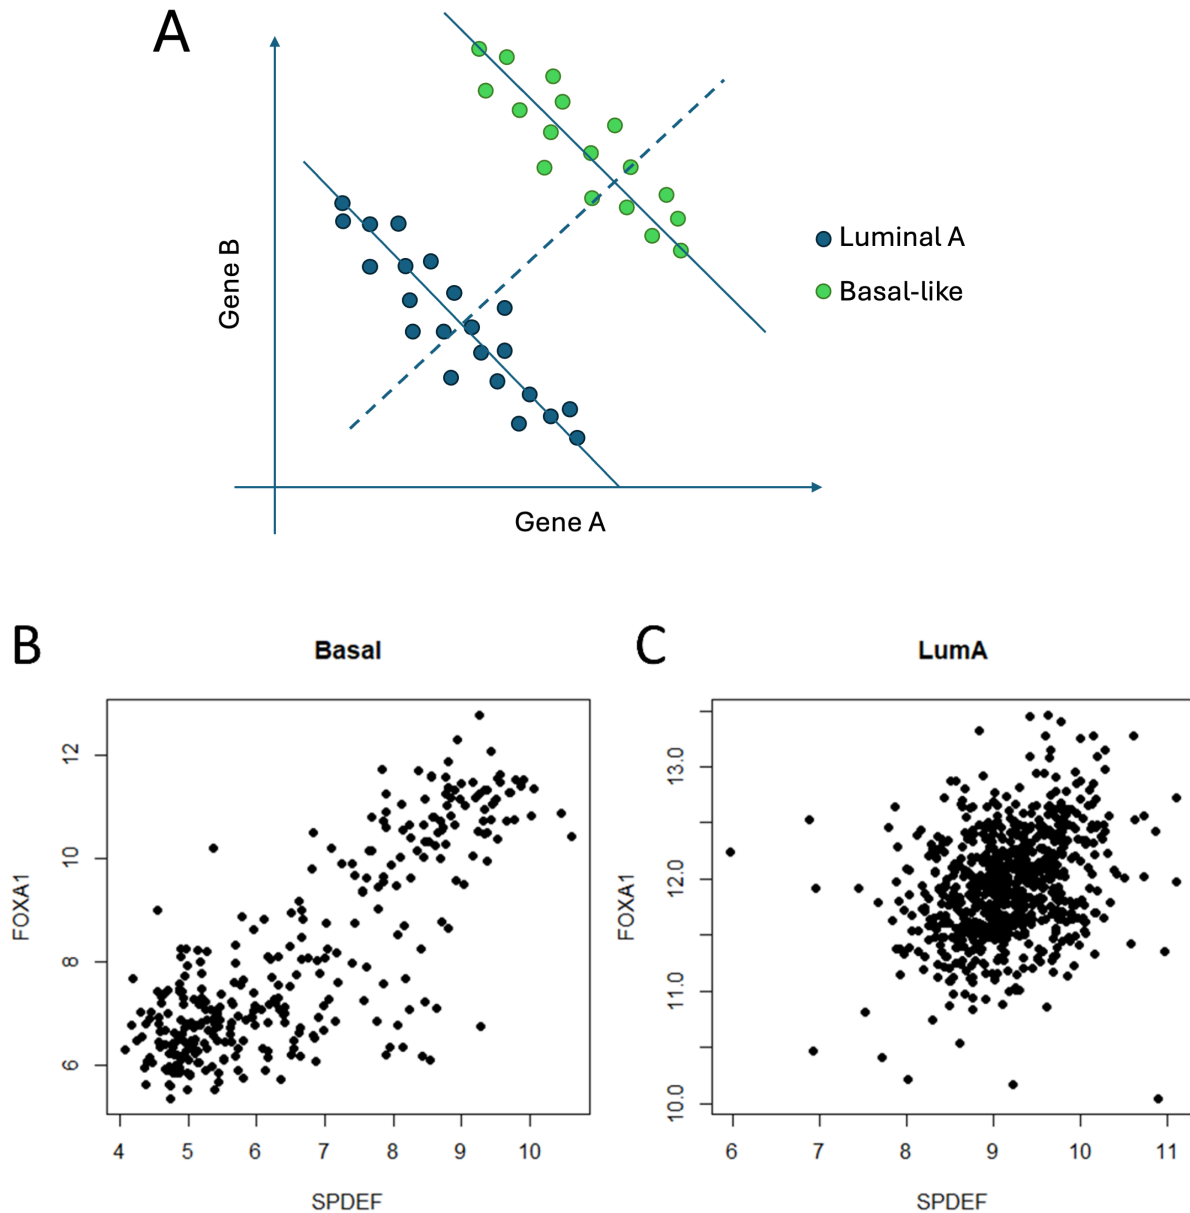

**Supplementary Figure 6. Exemplification of the Simpson's Paradox.** The Simpson's Paradox is a statistical phenomenon where an association between two variables in a dataset emerges, disappears or reverses when the data are divided into more homogeneous subgroups. **(A)** Two ideal genes, known to display overall positive correlation (not shown), are instead negatively correlated in Basal-like or Luminal A subtypes. **(B, C)** The correlation between FOXA1 and SPDEF is strikingly different between Basal-like tumors **(B)** and Luminal A tumors **(C)** in the METABRIC cohort.

A

## Connectivity

## Expression

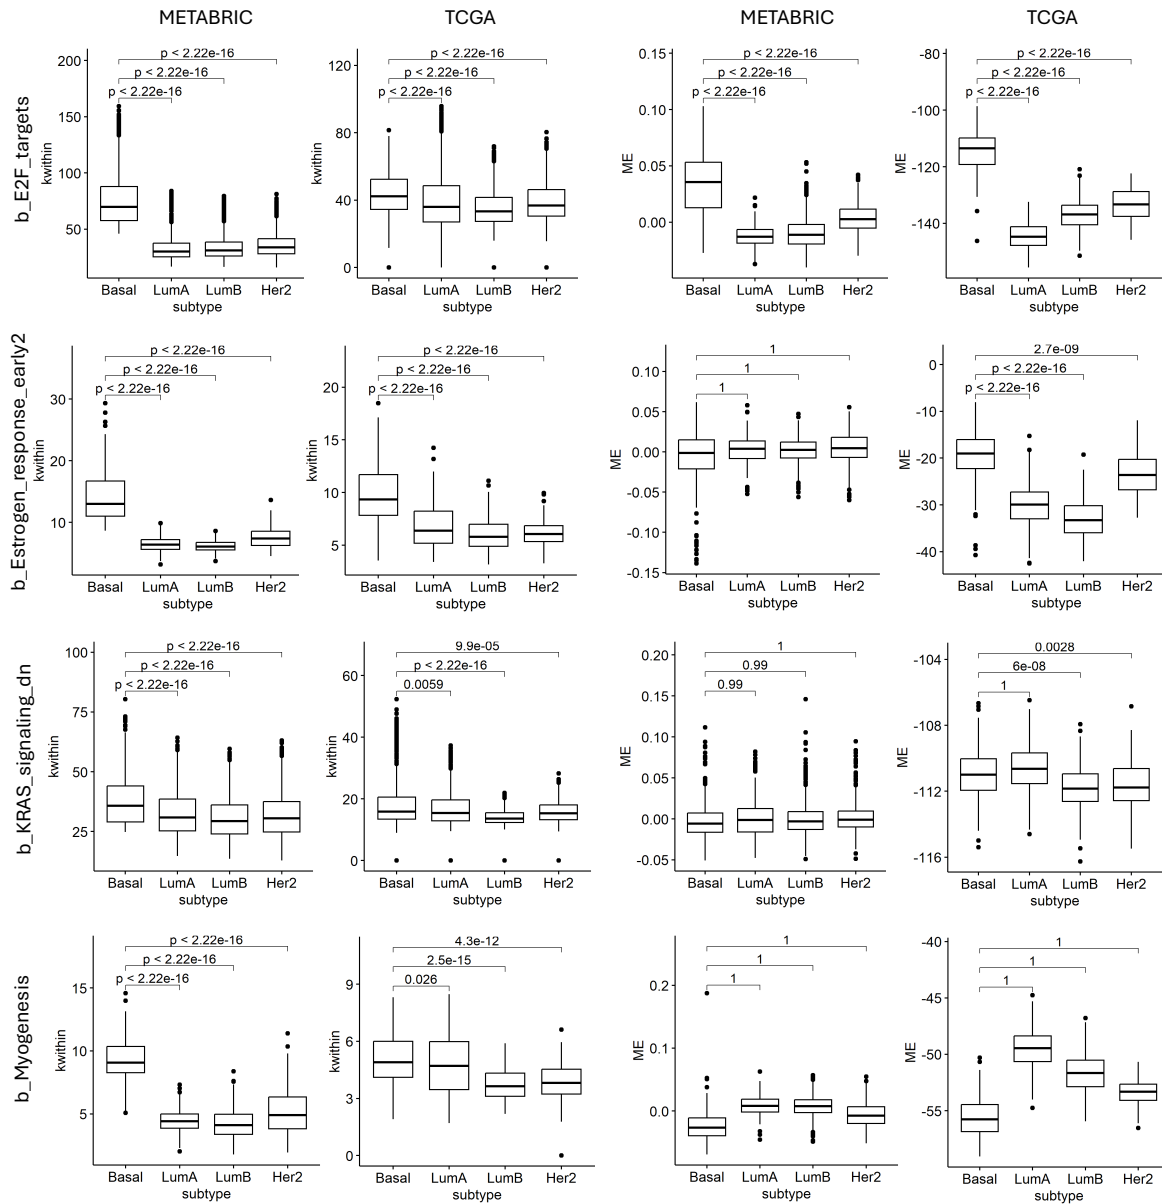

B

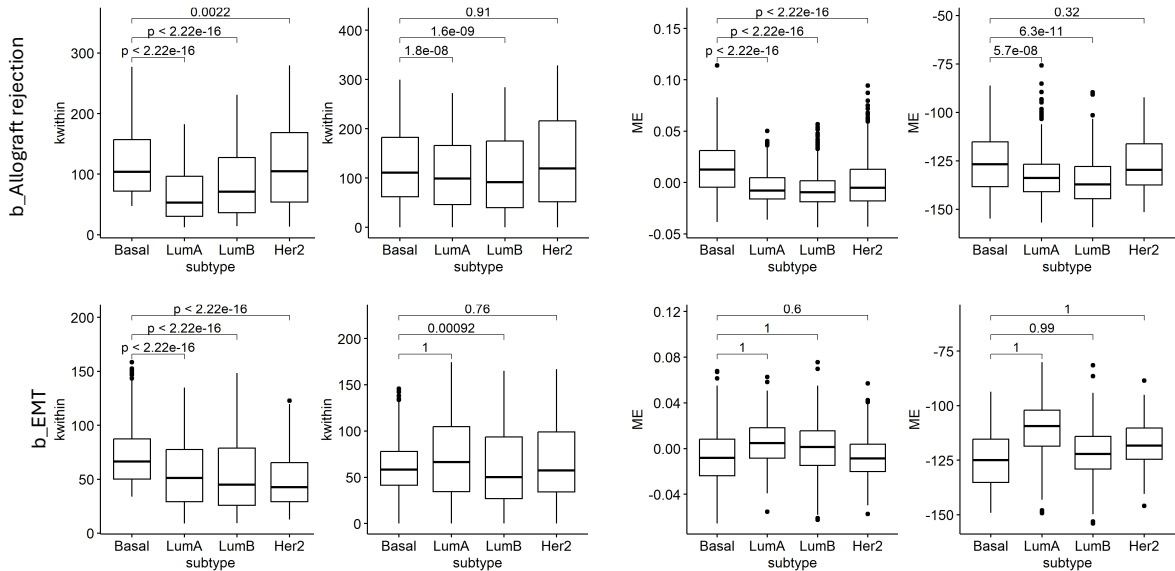

C

## Connectivity

## Expression

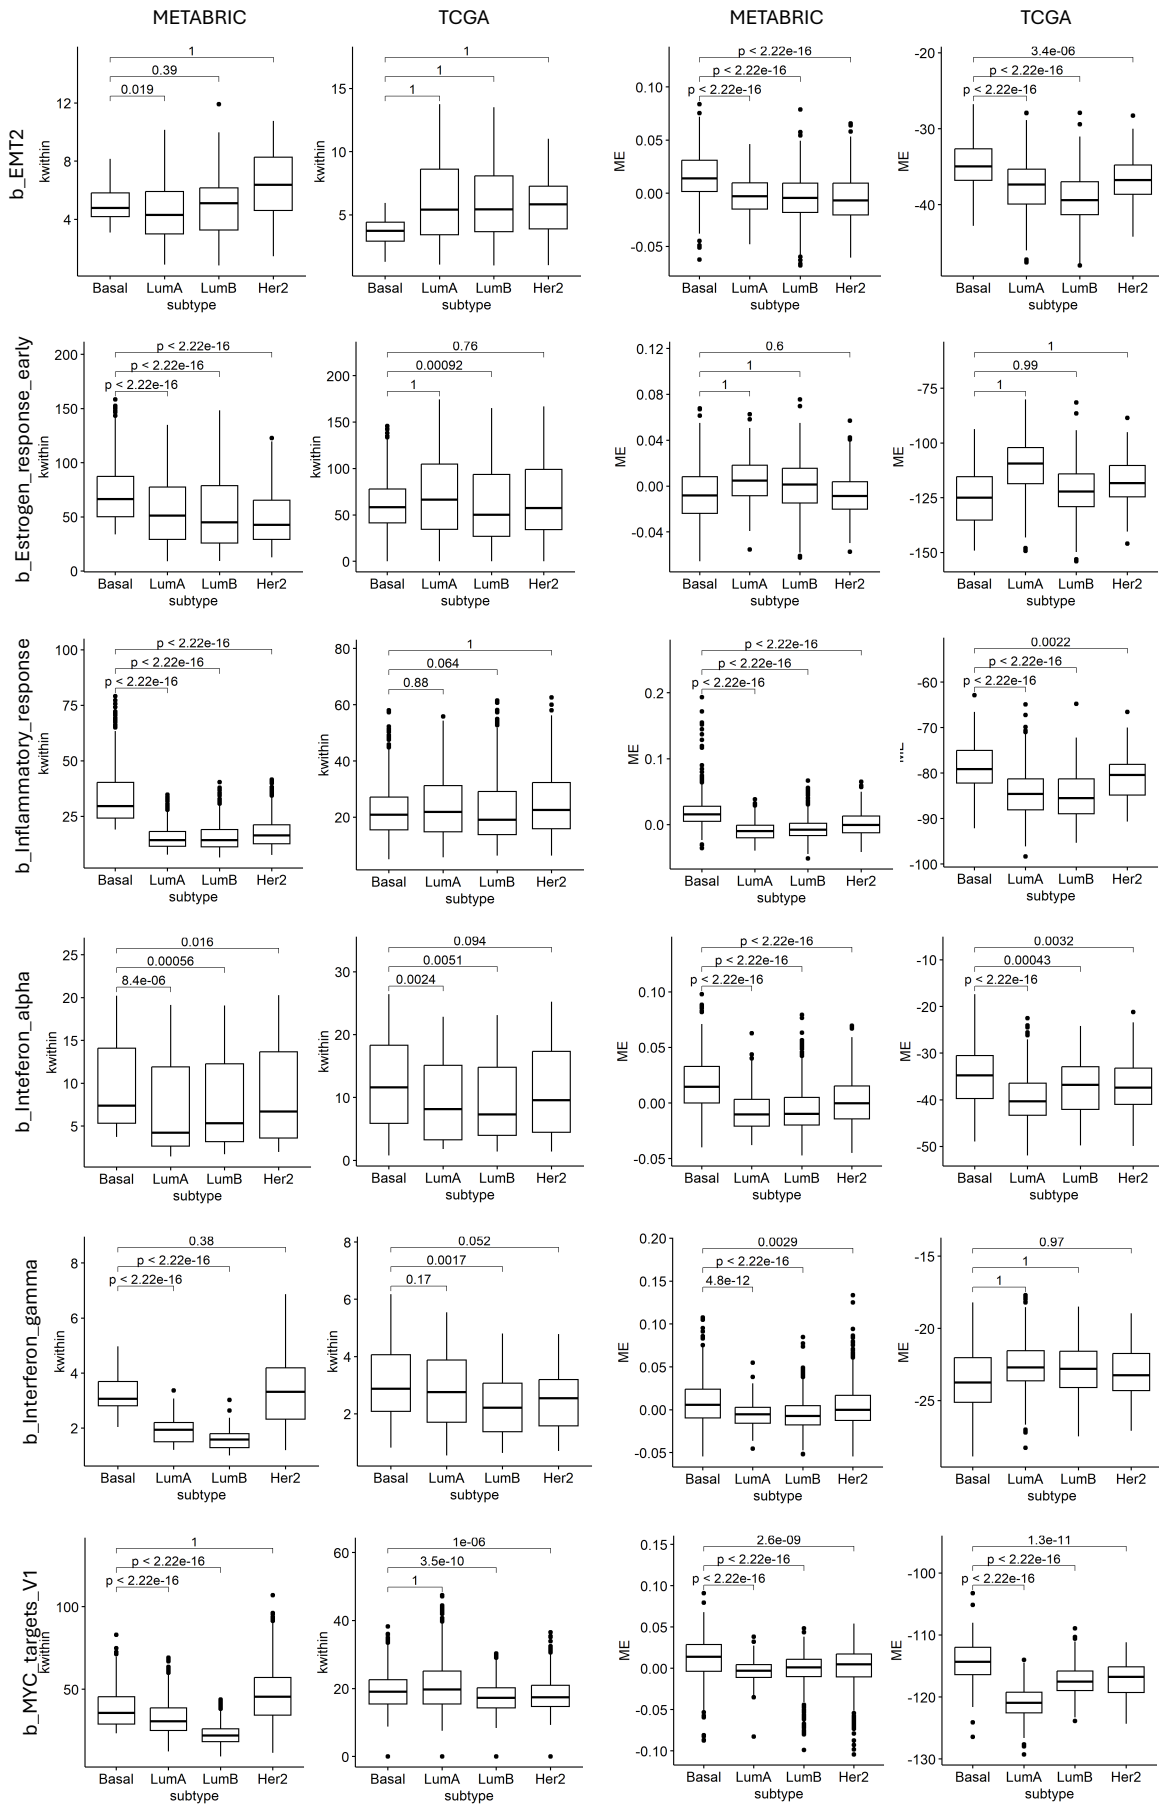

D

## Connectivity

## Expression

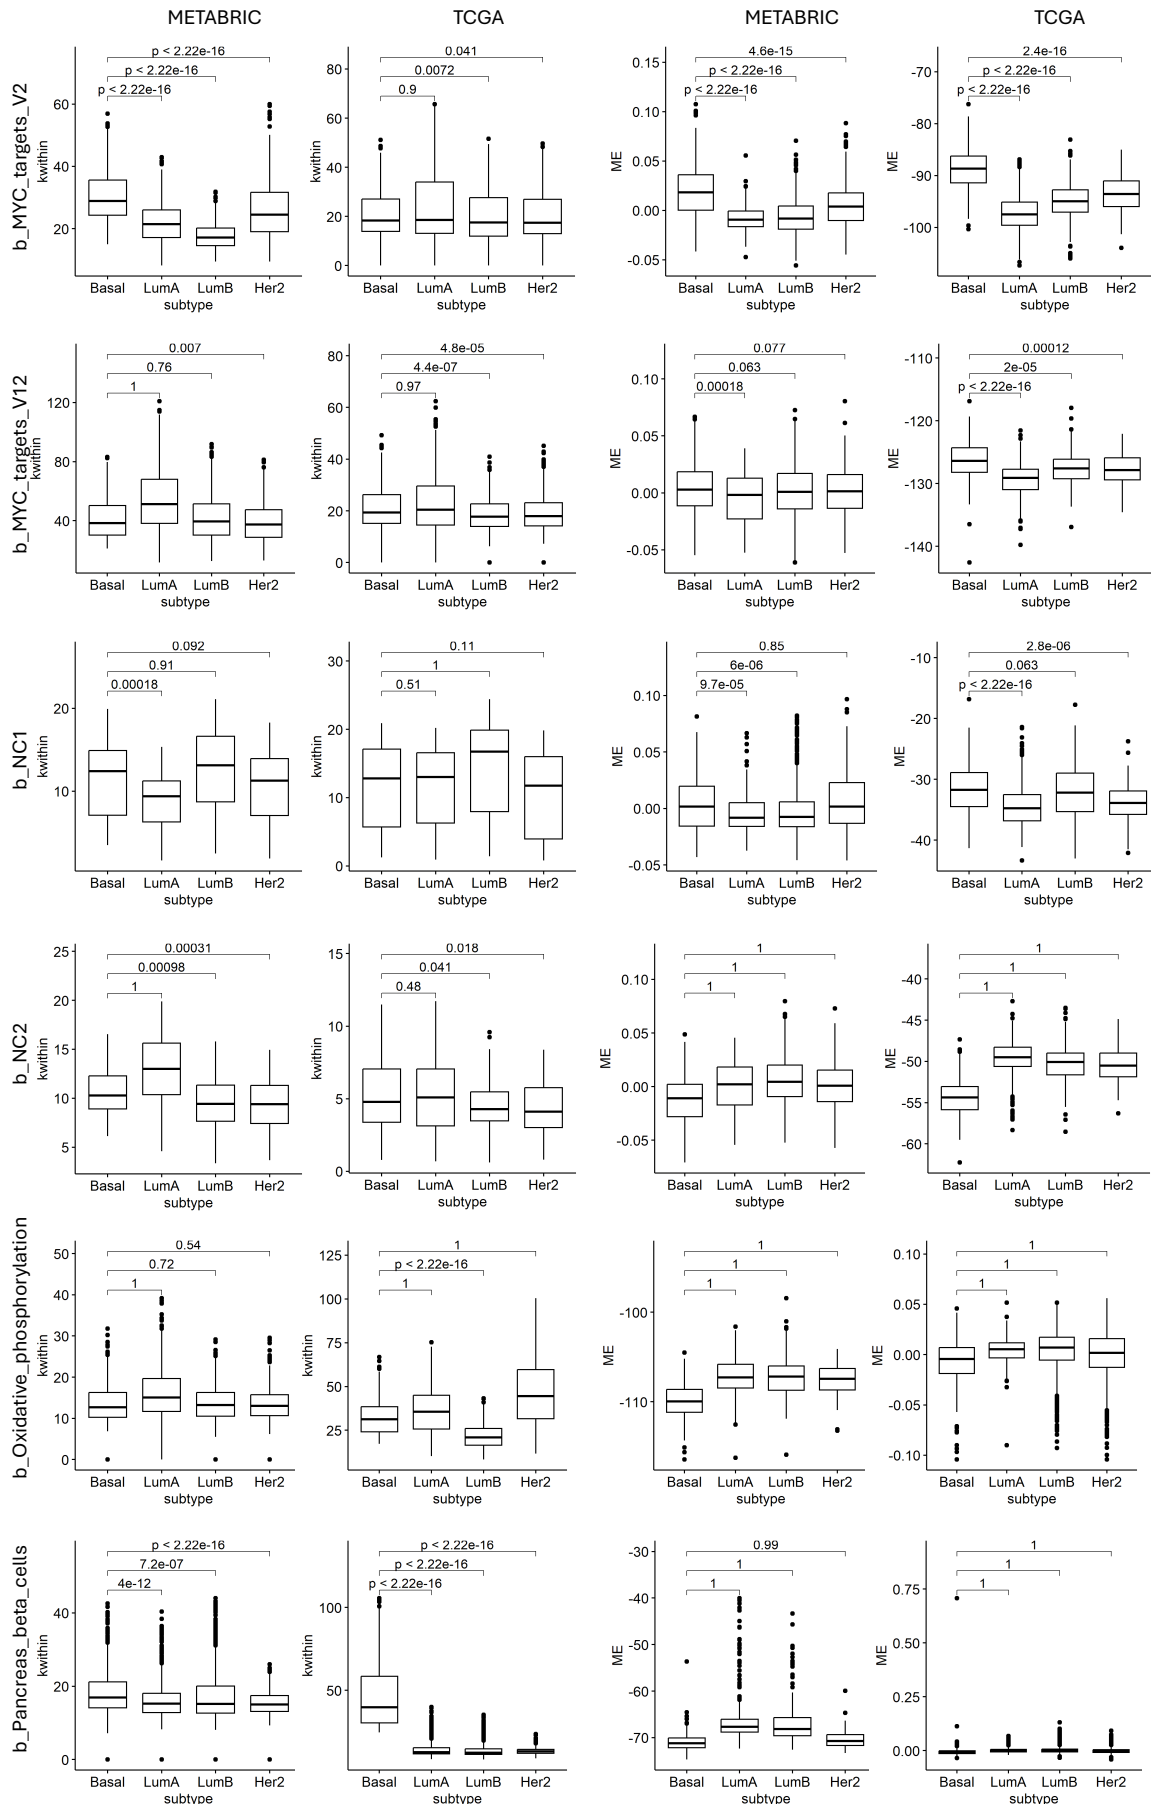

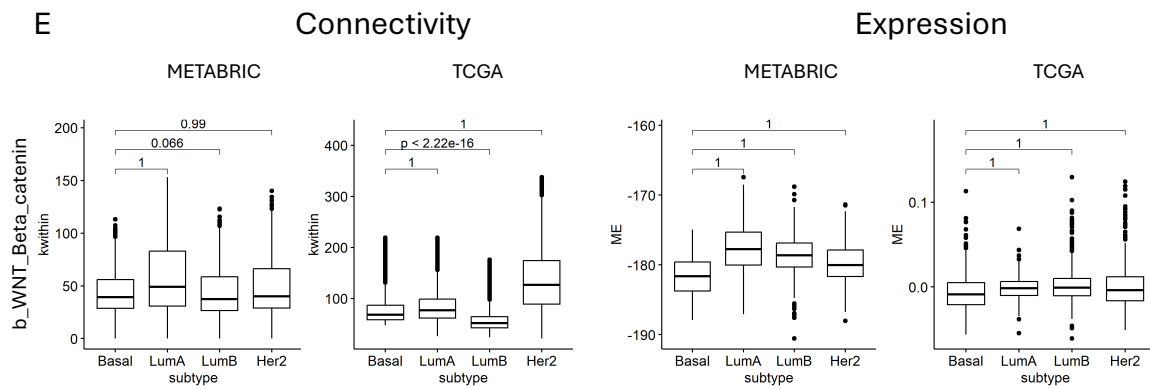

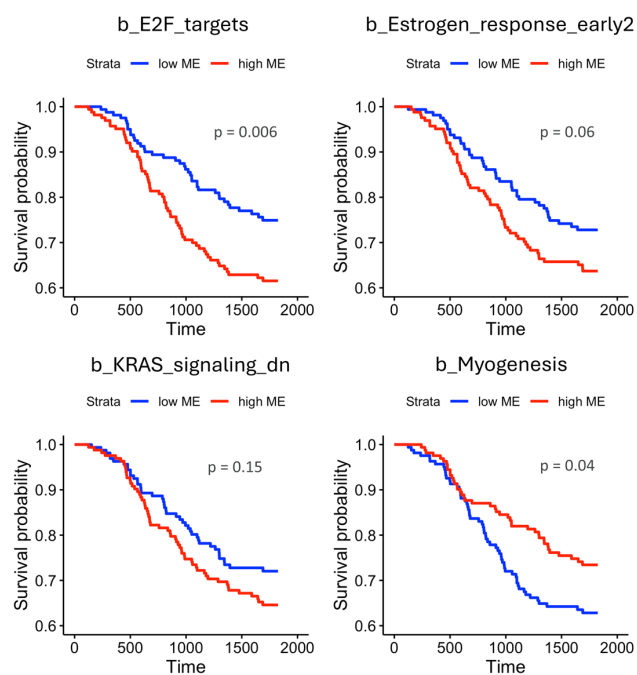

**Supplementary Figure 8. Kaplan-Meier survival curves for basal-like patients stratified by module expression.** Patients were grouped based on the module eigengene (ME) values of modules that show higher intramodular connectivity in basal-like tumours compared to other subtypes.



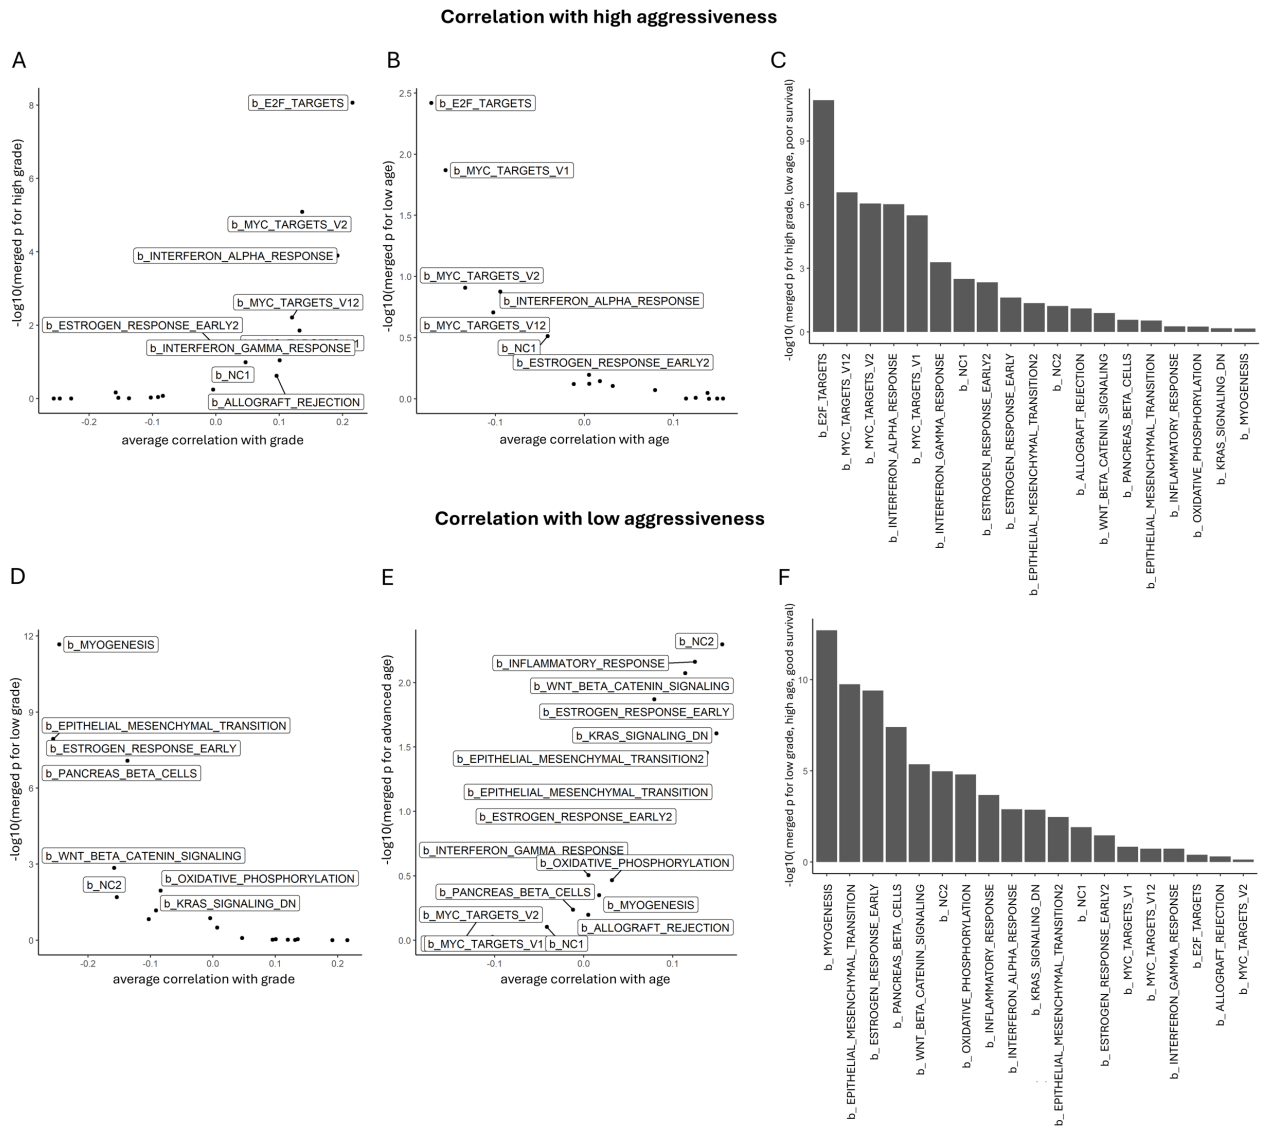

**Supplementary Figure 9. Summary of basal modules' relationship with clinical features. (A-C)** Modules' correlation with features of high aggressiveness: high grade **(A)**, early onset **(B)**, merged score for high grade, early onset and poor prognosis **(C)**. **(D-F)** Modules' correlation with features of low aggressiveness: low grade **(D)**, late onset **(E)**, merged score for low grade, late onset and good prognosis **(F)**. **(A,B,D,E)** For each clinical feature, p-values were obtained by merging the p-values across all the individual tested datasets with the Fisher's method, considering the direction of the relationship between module's expression and the clinical feature. **(C, F)** for each module, the overall significance for the relationship with grade, age at diagnosis and survival was obtained by multiplying the individual dataset-merged p-values. Only basal-like samples were employed in this analysis.

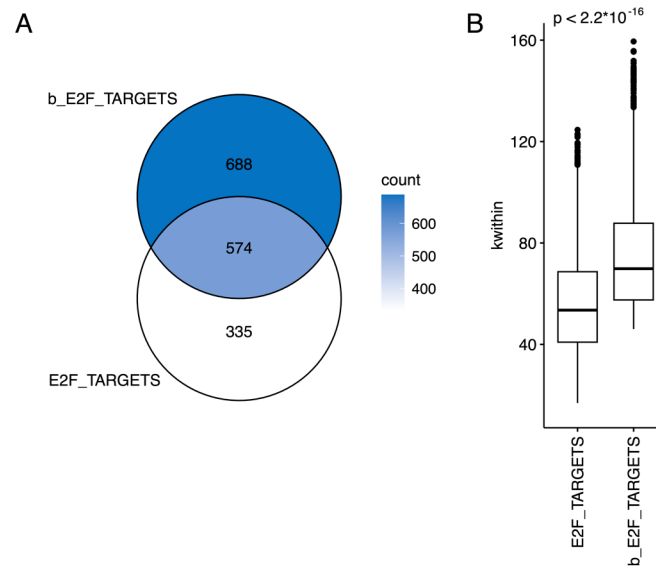

**Supplementary Figure 10. Comparison between global and basal-like-specific *E2F\_targets* modules. (A)** Venn diagram showing the overlap between genes in the *E2F\_targets* module (defined using all breast cancer samples) and the *b\_E2F\_targets* module (defined using only basal-like samples). **(B)** Boxplot comparing the intramodular connectivity (*kWithin*) of genes in each module, computed in basal-like samples. Statistical significance was assessed using a two-sided Wilcoxon test.

Highly connected **b\_E2F\_targets** transcription factors significantly regulate the expression of module's genes.

**Supplementary Table 1.**

*b\_E2F\_targets* genes belonging to the GO:0003700 - DNA-binding transcription factor activity - Gene Ontology term, *ranked by kWithin*

| TF     | kWithin    | rank | dataset                       |
|--------|------------|------|-------------------------------|
| FOXM1  | 151,849192 | 4    | GSE2222, GSE55204, GSE25741   |
| PTTG1  | 113,661926 | 97   | GSE48928                      |
| TEAD4  | 111,890624 | 104  |                               |
| EZH2   | 111,377135 | 106  | GSE36939, GSE48979, GSE103242 |
| E2F3   | 105,938864 | 137  |                               |
| FOXC1  | 104,640658 | 146  | GSE73234                      |
| PARP1  | 101,120351 | 161  | GSE34817                      |
| TFDP1  | 96,5986486 | 200  |                               |
| CEBPG  | 96,2457574 | 202  |                               |
| CHCHD3 | 95,9415737 | 208  |                               |
| NOLC1  | 93,6657614 | 241  |                               |
| HMGA1  | 91,4973555 | 265  | GSE45483, GSE35525            |
| UHRF1  | 90,0384401 | 286  |                               |
| TAF5   | 90,0092093 | 287  |                               |
| SOX9   | 89,7260918 | 289  |                               |
| BOLA1  | 88,419527  | 305  |                               |
| TCF7L1 | 88,3648149 | 306  |                               |
| SSRP1  | 88,2140726 | 310  | GSE92281                      |
| ZNF232 | 87,4847614 | 320  |                               |
| ZNF165 | 86,9895521 | 326  | GSE63984                      |
| ELF5   | 86,6682148 | 330  | GSE30405                      |
| RCOR2  | 84,5795255 | 357  |                               |
| NR2C2  | 82,2037687 | 390  |                               |
| ZBTB5  | 81,7372596 | 398  |                               |
| DNMT1  | 81,3654839 | 404  |                               |

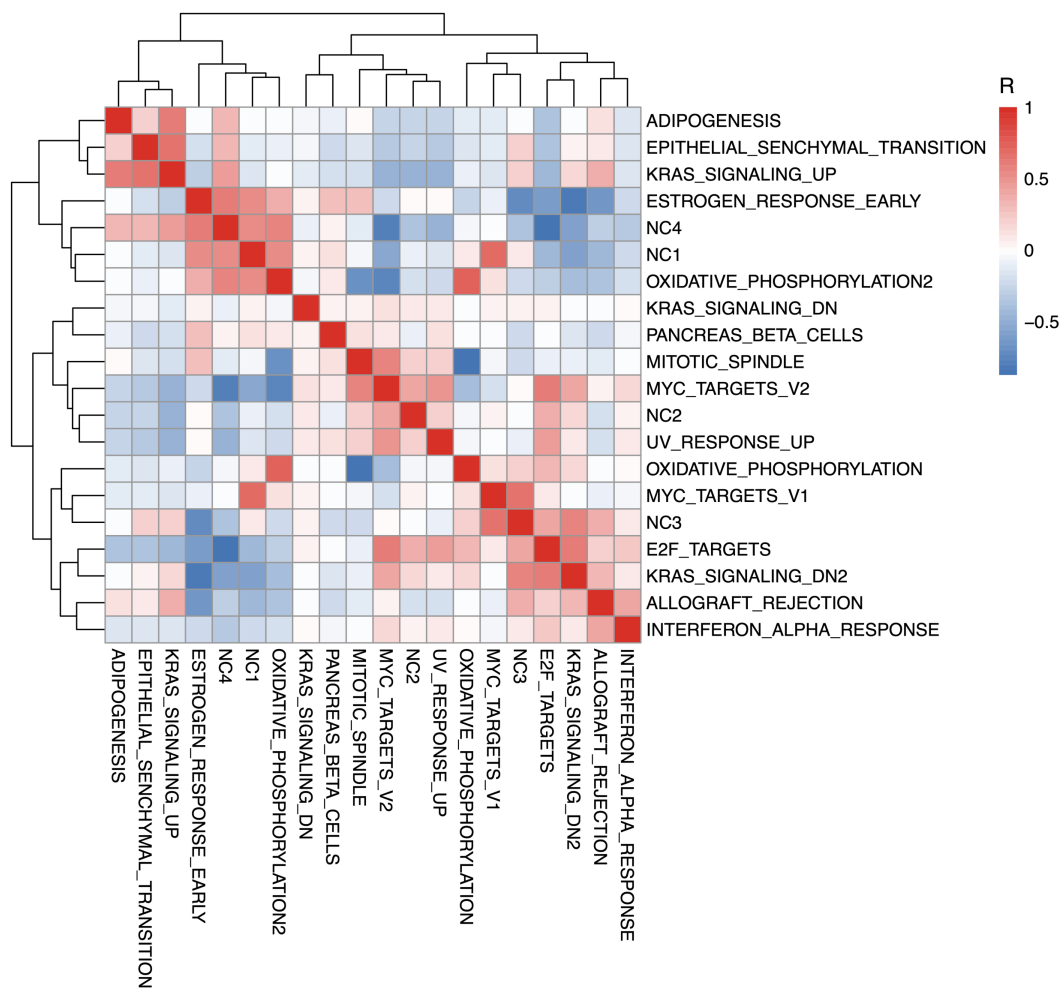

**Supplementary Figure 11. Correlations between basal-like modules.** Heatmap showing Pearson's correlation between module eigengenes, computed across basal-like patients. Hierarchical clustering was based on their eigengene correlation.

## Silencing of five TF hubs significantly affects proliferation of BLBC cell lines.

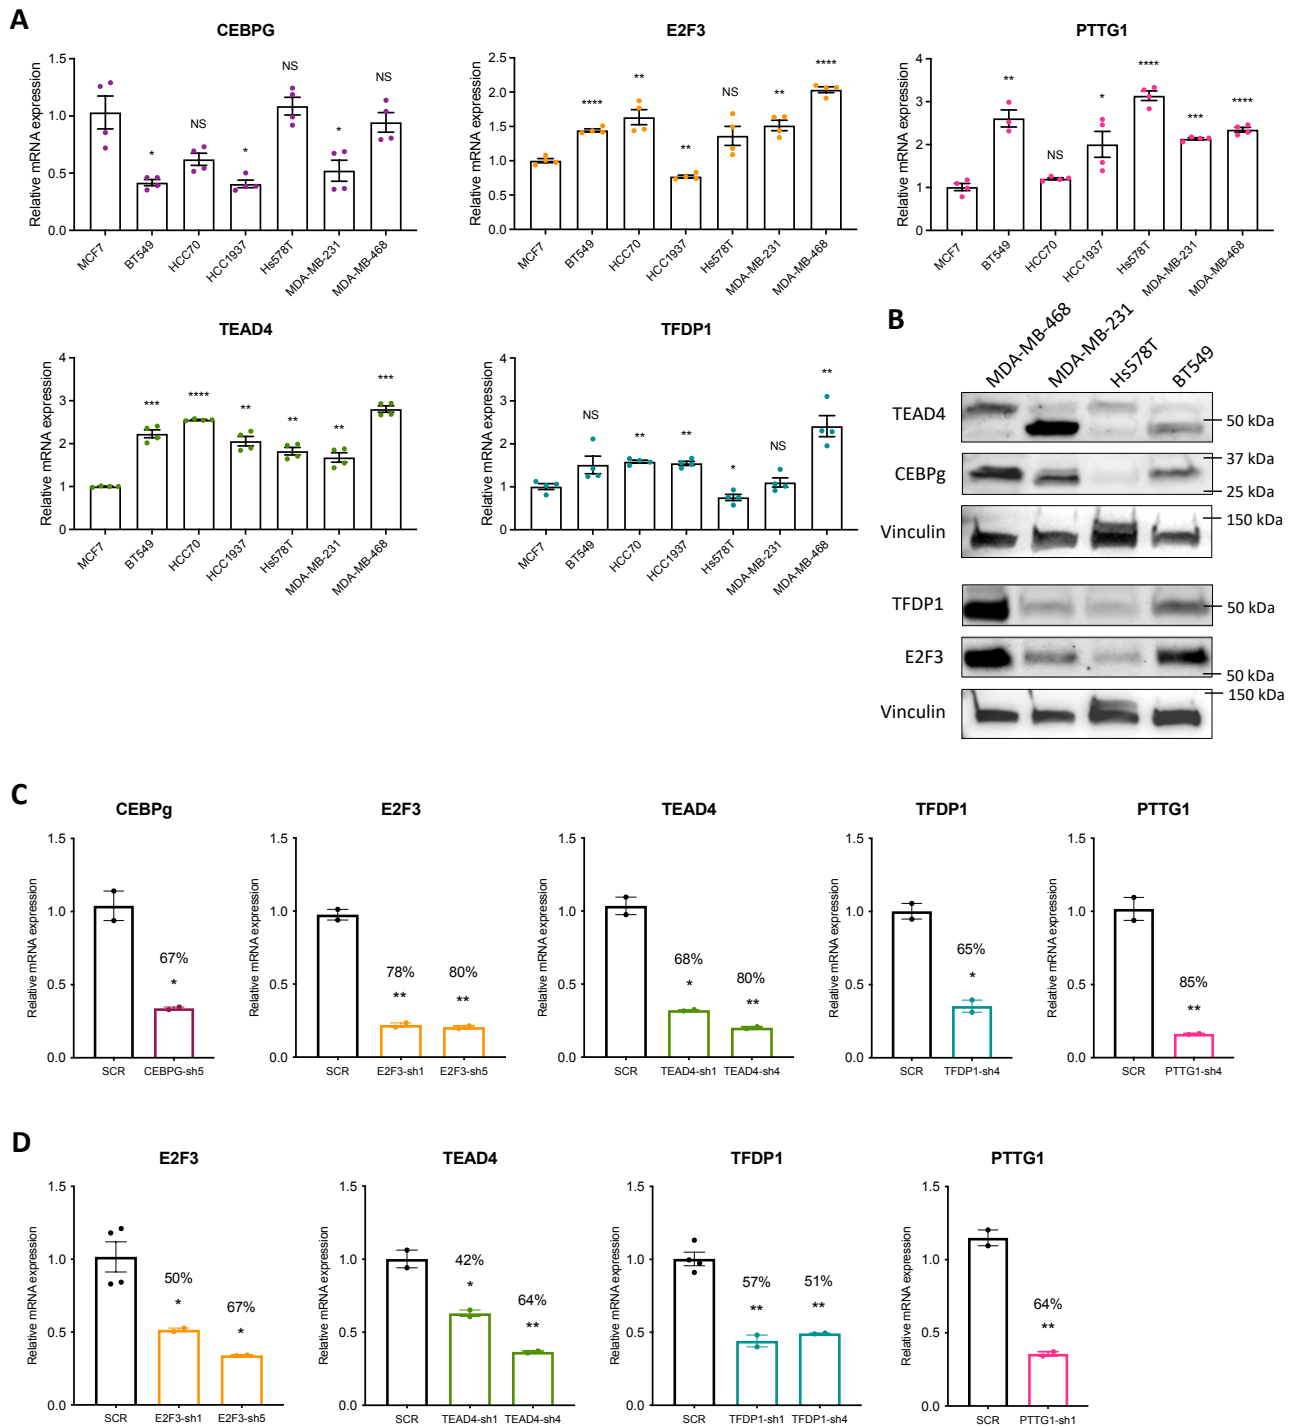

**Supplementary Figure 12. Expression and silencing of *b\_E2F\_targets* TF hubs.** The expression of the indicated genes was measured in the indicated cell lines by RT-qPCR (**A**), shown as mean $\pm$ S.E.M relative to the value of MCF7 cells upon normalization to Actin B (n=4 independent experiments), one way ANOVA. \*, p<0.05; \*\*, p<0.01, \*\*\*, p<0.001, \*\*\*\*, p<0.0001, or by Western blot on whole cell extracts (n=2 independent experiments) (**B**). TF hubs were silenced by lentiviral-mediated shRNA expression in MDA-MB-468 (**C**) and -231 (**D**) cells. Silencing was measured by qRT-PCR and is shown as mean $\pm$ S.E.M relative to the scrambled control (SCR). Only the best performing shRNAs are shown. (n=4 independent experiments). Unpaired t-test, \*, p<0.05; \*\*, p<0.01.

## Phenotypic effects of TF hub genes knockout correlate with transcriptional module disruption.

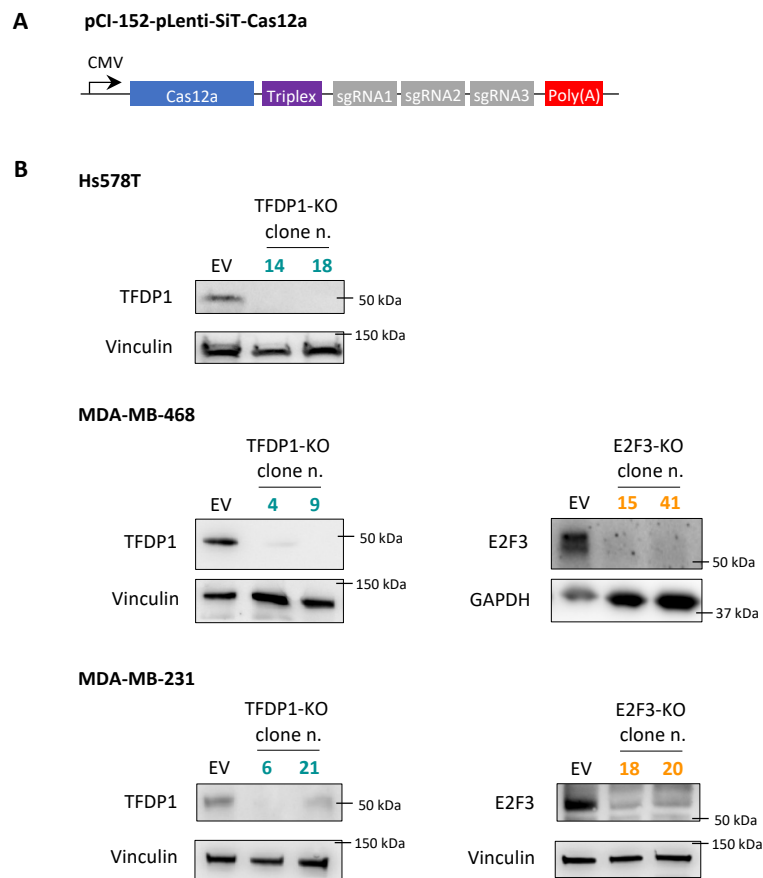

**Supplementary Figure 13. Generation of Hs578T, MDA-MB-231 and MDA-MB-468 cells KO for E2F3 and TFDP1.** (A) Schematic representation of vectors encoding for Cas12a (AsCfp1) and carrying a CRISPR array with 3 sgRNAs directed against the target genes. (B) Residual protein expression was assessed by Western blot analysis of different clones derived from the indicated cell lines, with the indicated antibodies.

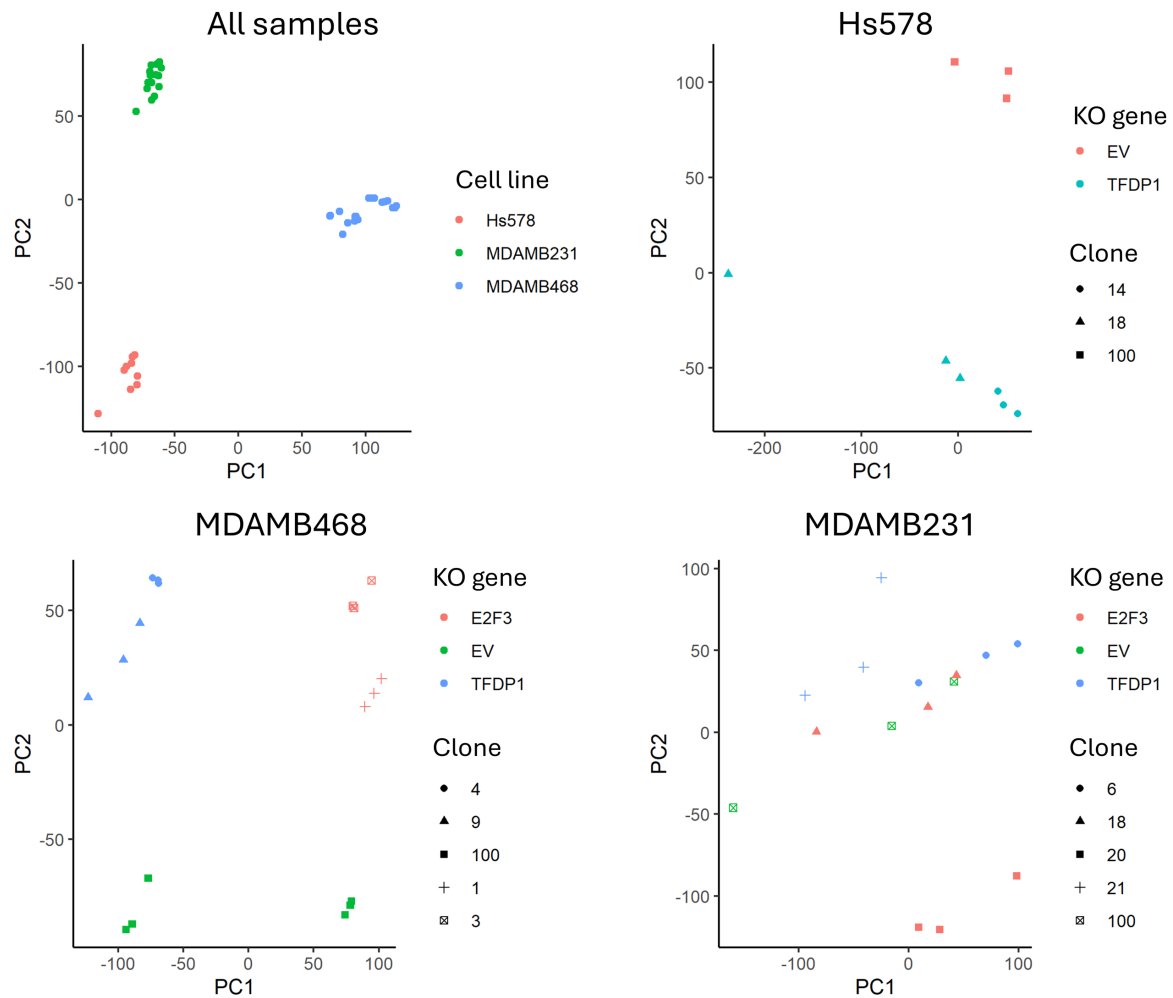

**Supplementary Figure 14. Principal Component Analysis (PCA) of RNA-seq data.** Each point represents a single sample. In the first plot, colors indicate the cell line. In the other plots, samples from each cell line are shown separately, and colors indicate the specific gene knockout or the empty vector control (EV). Clones are indicated by different shapes. Note that MDA-MB-468 E2F3 KO clones and their empty vector were sequenced in a different facility, explaining the PC1 separation from the other samples.

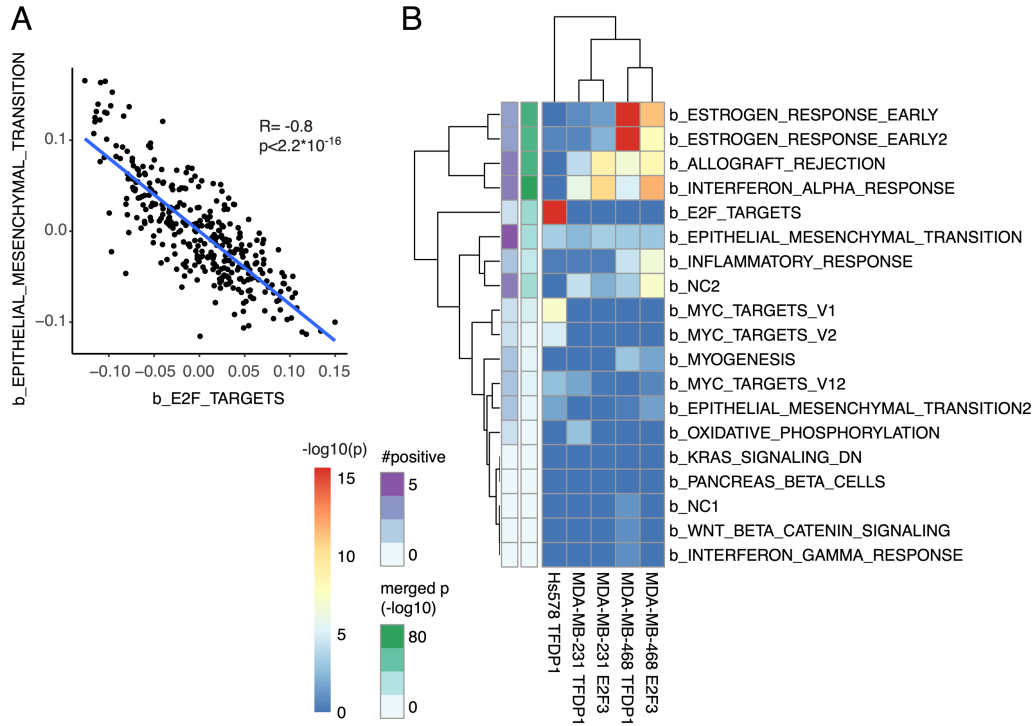

**Supplementary Figure 15. (A)** Scatter plot of *b\_E2F\_targets* and *b\_Epithelial\_mesenchymal\_transition* modules' eigengenes computed from METABRIC basal-like samples. Each point represents a patient, with the x- and y-axes showing the module eigengene of the *b\_E2F\_targets* and *b\_Epithelial\_Mesenchymal\_Transition* modules, respectively. **(B)** Enrichment significance of up-regulated genes upon TF hubs' KO in basal-like BC lines, in-house data.



**Suppl. Table 2. Comparison of all the TF hubs in the E2F\_targets and b\_E2F\_targets modules.**

The top 25% TF hubs in each module are shown in bold. Asterisks indicate genes completely absent from the general module.

Note that 7 of the validated genes (FOXC1, PARP1, SSRP, ELF5, TEAD4, E2F3, TFDP1) would have been missed without analysing subtype-specific networks.

**E2F\_targets**

| Gene          | kTotal      | kWithin     | rank |
|---------------|-------------|-------------|------|
| <b>FOXM1</b>  | 545,8059478 | 157,2385805 | 13   |
| <b>PTTG1</b>  | 518,1612739 | 146,7355187 | 27   |
| <b>E2F2</b>   | 518,25252   | 131,6658127 | 53   |
| <b>EZH2</b>   | 469,5950475 | 125,0671861 | 64   |
| <b>UHRF1</b>  | 447,6648191 | 117,7752092 | 82   |
| <b>HMGAI</b>  | 471,904967  | 93,27173723 | 165  |
| <b>E2F7</b>   | 417,0809894 | 88,19651424 | 195  |
| <b>DNMT1</b>  | 399,0062414 | 75,66846466 | 294  |
| <b>NOLC1</b>  | 398,2846515 | 75,06320196 | 301  |
| <b>CHCHD3</b> | 401,8862114 | 71,3488528  | 337  |
| <b>RCOR2</b>  | 421,053976  | 70,59843607 | 343  |
| <b>CEBPG</b>  | 427,9626136 | 66,98986737 | 385  |

|         |             |             |     |
|---------|-------------|-------------|-----|
| HNRNPAB | 414,5493711 | 66,32517897 | 391 |
| TEAD4   | 414,3963194 | 66,04319689 | 396 |
| SSRP1   | 441,1457563 | 65,37224264 | 405 |
| BOLA3   | 409,4217696 | 64,1340471  | 426 |
| GABPB1  | 389,0360498 | 63,83230828 | 433 |
| E2F5    | 388,8092443 | 62,5480216  | 456 |
| TFDP1   | 394,1785418 | 62,42070088 | 457 |
| NR2C2   | 395,1968325 | 60,94682183 | 476 |
| ZBED4   | 391,1925901 | 59,95355777 | 495 |
| WDHD1   | 367,8458545 | 59,83978917 | 497 |
| TAF2    | 377,9299012 | 59,5837054  | 501 |
| E2F8    | 357,7575194 | 58,91275579 | 512 |
| TAF5    | 390,7865121 | 58,45965623 | 523 |
| OTX1    | 392,2978003 | 57,78689338 | 541 |
| PHF5A   | 384,158976  | 57,16442653 | 552 |
| TGIF2   | 390,9910685 | 55,71181488 | 582 |
| E2F4    | 448,1823073 | 54,14917889 | 606 |
| SOX11   | 414,7745595 | 54,01127145 | 610 |
| TCF19   | 364,8410881 | 53,96747972 | 613 |
| NKRF    | 415,7650847 | 53,14778944 | 631 |
| C9orf40 | 376,7558987 | 51,13765336 | 676 |
| ZSCAN20 | 401,6309613 | 49,88284887 | 701 |
| ZNF280C | 373,1364283 | 48,37535118 | 723 |
| RC3H2   | 368,9169567 | 47,44852961 | 736 |
| BUD31   | 385,9782168 | 44,79921922 | 770 |
| NONO    | 349,6588008 | 44,22706657 | 776 |
| TAF4    | 368,5962118 | 43,44195666 | 788 |
| NME2    | 345,396577  | 42,40858874 | 801 |
| CARHSP1 | 391,870682  | 40,96340859 | 821 |
| ZNF207  | 353,4693083 | 39,36430153 | 843 |
| NFXL1   | 352,4212957 | 38,72882846 | 855 |
| SMARCC1 | 358,1545195 | 38,01927747 | 867 |
| HLTF    | 360,1994037 | 37,5891988  | 877 |
| ONECUT2 | 346,4645296 | 37,102465   | 886 |
| TFDP2   | 346,2991594 | 36,29408547 | 903 |

**b\_E2F\_targets**

| Gene          | kTotal      | kWithin      | rank |
|---------------|-------------|--------------|------|
| <b>FOXM1</b>  | 517,5179103 | 151,8491924  | 4    |
| <b>PTTG1</b>  | 446,7140888 | 113,6619256  | 97   |
| <b>TEAD4</b>  | 464,990407  | 111,8906237  | 104  |
| <b>EZH2</b>   | 432,6551732 | 111,3771352  | 106  |
| <b>E2F3*</b>  | 473,9321194 | 105,9388642  | 137  |
| <b>FOXC1*</b> | 440,7405836 | 104,6406577  | 146  |
| <b>PARP1*</b> | 479,4244058 | 101,1203506  | 161  |
| <b>TFDP1</b>  | 412,1732918 | 96,59864862  | 200  |
| <b>CEBPG</b>  | 448,8300016 | 96,24575739  | 202  |
| <b>CHCHD3</b> | 426,7689524 | 95,945157373 | 208  |
| <b>NOLC1</b>  | 422,1877497 | 93,6657614   | 241  |
| <b>HMGAI</b>  | 433,6303252 | 91,49735551  | 265  |
| <b>UHRF1</b>  | 404,7782849 | 90,03844009  | 286  |
| <b>TAF5</b>   | 416,5724709 | 90,00920929  | 287  |
| <b>SOX9</b>   | 421,4073231 | 89,72609181  | 289  |
| <b>BOLA1</b>  | 422,449619  | 88,41952699  | 305  |
| <b>TCF7L1</b> | 414,9359793 | 88,36481492  | 306  |
| <b>SSRP1</b>  | 460,6987668 | 88,21407263  | 310  |
| <b>ZNF232</b> | 436,6607204 | 87,48476136  | 320  |
| <b>ZNF165</b> | 427,9250669 | 86,9895521   | 326  |
| <b>ELF5*</b>  | 393,182212  | 86,66821477  | 330  |
| <b>RCOR2</b>  | 429,3935035 | 84,57952549  | 357  |
| <b>NR2C2</b>  | 399,5668967 | 82,20376874  | 390  |
| <b>ZBTB5</b>  | 391,6089104 | 81,73725958  | 398  |
| <b>DNMT1</b>  | 394,6842731 | 81,36548393  | 404  |

|          |             |             |      |
|----------|-------------|-------------|------|
| E2F7     | 400,8491659 | 80,10593558 | 422  |
| ZSCAN20  | 427,7471509 | 79,86075991 | 425  |
| PHF5A    | 395,2935163 | 79,29558779 | 433  |
| YEATS2   | 406,0701829 | 78,21482604 | 461  |
| SOX10    | 389,7648041 | 77,9770118  | 467  |
| ZNF239   | 403,9111869 | 77,78196325 | 469  |
| FUBP1    | 396,8369653 | 77,60745143 | 473  |
| SMARCC1  | 397,8883862 | 77,5632953  | 474  |
| ZNF384   | 405,9870069 | 76,93547543 | 487  |
| WDHD1    | 385,5216104 | 76,75213613 | 494  |
| ZNF670   | 382,3450882 | 75,2118989  | 519  |
| NFYA     | 382,4027691 | 75,06933825 | 520  |
| TGIF2    | 417,1442289 | 74,44344408 | 532  |
| TFCP2L1  | 394,6230583 | 74,05010485 | 541  |
| YBX3     | 384,5219229 | 72,35824483 | 576  |
| VGLL1    | 387,5594175 | 72,34639726 | 578  |
| MAZ      | 401,513753  | 72,28084519 | 580  |
| EN1      | 399,3617986 | 71,75996199 | 588  |
| YBX1     | 382,3245053 | 71,23871339 | 594  |
| TMSB15B  | 380,9568685 | 70,92572076 | 606  |
| OTX1     | 393,3594442 | 70,89675465 | 607  |
| SOX4     | 401,6418641 | 69,51332771 | 644  |
| ZBED4    | 376,3568408 | 69,22634404 | 653  |
| GATAD2B  | 409,5072559 | 69,21675457 | 654  |
| FOXP4    | 402,3270348 | 68,90484656 | 662  |
| NFE2L3   | 399,5758507 | 67,69332685 | 683  |
| TFDP2    | 382,6879624 | 67,29559159 | 697  |
| ZFP82    | 400,0982005 | 67,28340886 | 698  |
| NFXL1    | 373,4736797 | 66,88047719 | 703  |
| TBX19    | 389,1013931 | 66,78783836 | 705  |
| C9orf40  | 366,3663232 | 66,11517465 | 732  |
| AEBP2    | 380,2555544 | 65,89111461 | 740  |
| CEBPB    | 403,5518432 | 65,73412403 | 742  |
| HLTF     | 377,9463084 | 65,17978805 | 755  |
| ZNF286A  | 378,4517372 | 64,75248909 | 766  |
| E2F8     | 354,9233308 | 64,68845453 | 768  |
| ADNP2    | 373,5173621 | 64,42152296 | 773  |
| NONO     | 387,8471739 | 63,97066484 | 781  |
| HCFC1    | 371,2887376 | 63,88609397 | 785  |
| ETV3     | 368,2194684 | 62,83174142 | 811  |
| MLLT10   | 363,2272514 | 62,70973976 | 817  |
| BUD31    | 411,0265793 | 61,54055655 | 850  |
| NKX2-5   | 361,3111176 | 61,24424751 | 855  |
| TCF19    | 381,1940255 | 61,19142204 | 857  |
| NFIB     | 378,5458887 | 61,07810058 | 859  |
| ZNF280C  | 364,8530416 | 60,89722564 | 863  |
| ETV4     | 380,0937957 | 59,76683398 | 895  |
| PLAGL2   | 349,1219779 | 59,46128338 | 901  |
| LMO4     | 405,0865999 | 59,06760596 | 913  |
| TEAD2    | 391,1747808 | 58,70543135 | 920  |
| HR       | 373,5257837 | 58,55145997 | 922  |
| BARX2    | 355,5920909 | 57,94898961 | 942  |
| TAF4     | 377,8939906 | 57,33074599 | 953  |
| STAG1    | 366,1406773 | 57,29681045 | 954  |
| MYNN     | 367,215472  | 57,21276879 | 958  |
| ALX1     | 362,9987381 | 56,62261547 | 977  |
| SCML2    | 376,7797932 | 56,48103523 | 980  |
| SRF      | 380,4723943 | 56,23521831 | 987  |
| ENO1     | 422,2986428 | 56,12750106 | 990  |
| ZNF576   | 370,1216093 | 53,1790406  | 1060 |
| HNRNPAB  | 365,8886302 | 52,9682541  | 1065 |
| ZNF121   | 353,8446039 | 52,74373801 | 1071 |
| NOCT     | 392,767661  | 52,34512882 | 1080 |
| BMPRI1A  | 353,8991549 | 52,10447718 | 1086 |
| POU4F1   | 352,3619428 | 51,23862725 | 1118 |
| LRRIIP2  | 374,0518174 | 50,95025584 | 1124 |
| DMRT1    | 356,3936143 | 50,8452056  | 1127 |
| FOXK2    | 353,0962496 | 50,39816632 | 1142 |
| ZNF519   | 363,9779497 | 50,31956502 | 1147 |
| RLF      | 359,5718594 | 50,31559673 | 1148 |
| KIAA1549 | 369,3737717 | 50,07255753 | 1158 |
| ZNF280B  | 362,9154775 | 49,7708106  | 1169 |
| PPARA    | 357,3288836 | 49,46446769 | 1177 |
| ZNF285   | 366,2030602 | 49,44221832 | 1178 |
| ZSCAN16  | 371,1125928 | 48,99338275 | 1195 |
| TET1     | 361,6461064 | 48,38719262 | 1216 |
| ZNF200   | 351,8604136 | 47,61080732 | 1240 |

## Supplementary Material and Methods

**Supplementary Table 3.** shRNA, sgRNA, qRT-PCR assay sequences and IDs.

| shRNA     | clone ID       | sequence                                                   |
|-----------|----------------|------------------------------------------------------------|
| CEBPG-sh1 | TRCN0000003836 | CCGGTGGCGACAATGCAGGACAGTACTCGAGTACTGTCTGCATTGTCGCCATTTTT   |
| CEBPG-sh2 | TRCN0000003837 | CCGGGCAACGCCGAGAGAGGAACAACCTCGAGTTGTTCTCTCGGCGTTGCTTTTT    |
| CEBPG-sh3 | TRCN0000003838 | CCGGCCTCACCTTTCCAGACTTTACTCGAGTAAAGTCTGGAAAGGGTGAGGTTTTT   |
| CEBPG-sh4 | TRCN0000003839 | CCGGCTGACCAAGGAATTAAGTGTACTCGAGTACACTTAATTCCTTGGTCAGTTTTT  |
| CEBPG-sh5 | TRCN0000010821 | CCGGGATTGTTTCTTGAGCATGCACTCGAGTGCATGCTCAAGAAACAAATCTTTTT   |
| E2F3-sh1  | TRCN0000013803 | CCGGCCGCTTTACTCTTCAGGAATCTCGAGATTCTGAAGAGTAAAGCGGGTTTTT    |
| E2F3-sh2  | TRCN0000013804 | CCGGCCTCATTAGAAGAAGTCTAACTCGAGTTAGACTTCTTCTTAATGAGGTTTTT   |
| E2F3-sh3  | TRCN0000013805 | CCGGCCAACTGTTATAGTTGTGAAGTCTCGAGTTCACAACTATAACAGTTTGGTTTTT |
| E2F3-sh4  | TRCN0000013806 | CCGGCCTGACTCAATAGAGAGCCTACTCGAGTAGGCTCTCTATTGAGTCAGGTTTTT  |
| E2F3-sh5  | TRCN0000013807 | CCGGCCAACTCAGGACATAGCGATTCTCGAGAATCGCTATGTCTGAGTTGGTTTTT   |
| TEAD4-sh1 | TRCN0000015873 | CCGGGAAGAGACGTGTGTGCAGGAACCTCGAGTTCCTGCACACGCTCTCTTTTTT    |
| TEAD4-sh2 | TRCN0000015874 | CCGGCCCGGATATTGAGCAGAGTTTCTCGAGAACTCTGCTCAATATCCGGGTTTTT   |
| TEAD4-sh3 | TRCN0000015875 | CCGGGAGACAGAGTATGCTCGCTATCTCGAGATAGCGAGCATACTCTGTCTTTTTT   |
| TEAD4-sh4 | TRCN0000015876 | CCGGCCTTCTCTCAGCAAACCTATCTCGAGATAGGTTTGCTGAGAGAAAGGTTTTT   |
| TEAD4-sh5 | TRCN0000015877 | CCGGGCTGTGCATTGCCTATGTCTTCTCGAGAAGACATAGGCAATGCACAGCTTTTTT |
| PTTG1_sh1 | TRCN0000015103 | CCGGCCTTCAATCAAAGCCTTAGATCTCGAGATCTAAGGCTTTGATTGAAGGTTTTT  |
| PTTG1_sh2 | TRCN0000015104 | CCGGCCTTACCTAAAGCTACTAGAATCGAGTTCTAGTAGCTTTAGGTAAGGTTTTT   |
| PTTG1_sh3 | TRCN0000015105 | CCGGCCAATCTGTTGCAGTCTCTTCTCGAGAAGGAGACTGCAACAGATTGGTTTTT   |
| PTTG1_sh4 | TRCN0000015106 | CCGGCCCTTCAATCCTCTAGACTTTCTCGAGAAAGTCTAGAGGATTGAAGGTTTTT   |
| PTTG1_sh5 | TRCN0000015107 | CCGGTGTGGTGCTAAGGATGGGCTCTCGAGAGCCATCCTTAGCAACCACTTTTTT    |
| TFDP1-sh1 | TRCN0000019880 | CCGGCCTACGGCATTCTCCATGAATCGAGTTCATGGAGAAATGCCGTAGGTTTTT    |
| TFDP1-sh2 | TRCN0000019881 | CCGGGTCTTCATAGACCAGAACCTTCTCGAGAAGGTTCTGGTCTATGAAGACTTTTTT |
| TFDP1-sh3 | TRCN0000019882 | CCGGCGACAACCACATCTTACCAAACCTCGAGTTTGGTAAGATGTGGTTGTCGTTTTT |
| TFDP1-sh4 | TRCN0000019883 | CCGGGACGATGACTTCAACGAGAATCTCGAGATTCTCGTTGAAGTCATCGTCTTTTTT |
| TFDP1-sh5 | TRCN0000019879 | CCGGCCGCTTATTTGCCGTGAGTTTCTCGAGAACTCACGGCAAATAAGCGGTTTTT   |
| SCR       |                | CCGGCCTAAGGTTAAGTCGCCCTCGCTCGAGCGAGGGCGACTTAACCTTAGGTTTTT  |

| sgRNA   | sequence                                                                                                          |
|---------|-------------------------------------------------------------------------------------------------------------------|
| hsE2F3  | AGATGAATATCTTGATATGTAAACATAAAATTTCTACTCTTGATAGTTGATACCAACGTTCTGGAAGAAATTTCTACTCTTGATAGTACTATCTGACTTCGTAGTGCA      |
| hsTFDP1 | AGATAAGGAAGCGCAACAGGAAAGGAGAAATTTCTACTCTTGATAGATAAGGTGGAAAGACAGAGGAGACTAATTTCTACTCTTGATAGATGCAAAATGCCTCAAGAACCTGG |

| gene  | cat. n. | qRT-PCR assay ID |
|-------|---------|------------------|
| CEBPG | 4331182 | Hs00156454_m1    |
| E2F3  | 4331182 | Hs00605457_m1    |
| FoxM1 | 4453320 | Hs01073586_m1    |
| PTTG1 | 4331182 | Hs00851754_u1    |
| TEAD4 | 4331182 | Hs01125032_m1    |
| TFDP1 | 4331182 | Hs00955491_gH    |
| TFDP1 | 4331182 | Hs00955488_g1    |
| GAPDH | 4331182 | Hs99999905_m1    |
| B-act | 4448484 | Hs01060665_g1    |
